# Supplementary material for: Effects of sodium-glucose co-transporter 2 (SGLT2) inhibition on renal function and albuminuria in patients with type 2 diabetes: a systematic review and meta-analysis
Source: PeerJ journal article supplement (doi:10.7717/peerj.3405), 2017-06-27

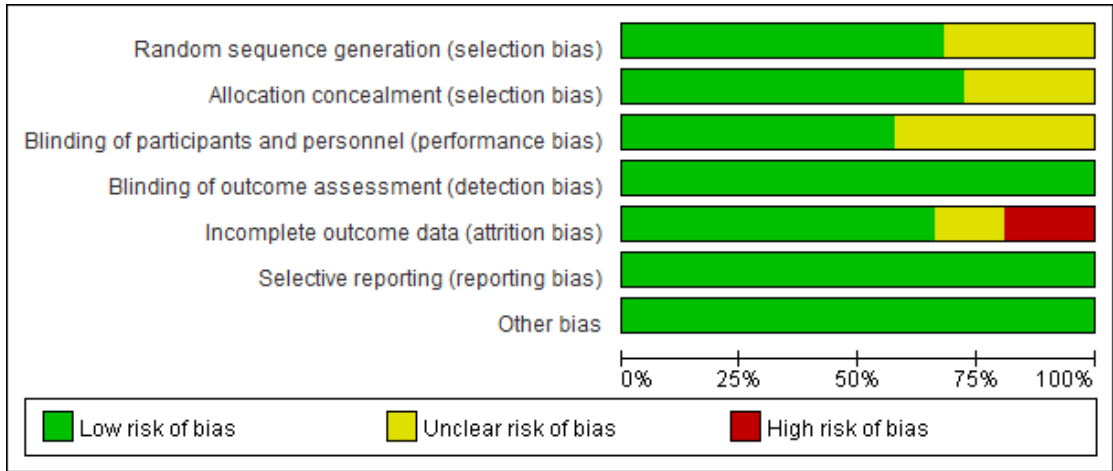

Supplement: Figure_S1_risk_of_bias_summary.pdf [file Figure_S1_risk_of_bias_summary.pdf]
