# Supplementary material for: Effects of sodium-glucose co-transporter 2 (SGLT2) inhibition on renal function and albuminuria in patients with type 2 diabetes: a systematic review and meta-analysis
Source: PeerJ journal article supplement (doi:10.7717/peerj.3405), 2017-06-27
Supplement: Figure_S2_risk_of_bias_summary.pdf [file Figure_S2_risk_of_bias_summary.pdf]

|                             | Random sequence generation (selection bias) | Allocation concealment (selection bias) | Blinding of participants and personnel (performance bias) | Blinding of outcome assessment (detection bias) | Incomplete outcome data (attrition bias) | Selective reporting (reporting bias) | Other bias |
|-----------------------------|---------------------------------------------|-----------------------------------------|-----------------------------------------------------------|-------------------------------------------------|------------------------------------------|--------------------------------------|------------|
| Bailey 2015                 | ●                                           | ●                                       | ●                                                         | ●                                               | ●                                        | ●                                    | ●          |
| Barnett 2014                | ●                                           | ●                                       | ●                                                         | ●                                               | ●                                        | ●                                    | ●          |
| Bode 2013                   | ●                                           | ●                                       | ●                                                         | ●                                               | ●                                        | ●                                    | ●          |
| Bolinder 2012               | ●                                           | ●                                       | ●                                                         | ●                                               | ●                                        | ●                                    | ●          |
| Cefalu 2013                 | ●                                           | ●                                       | ●                                                         | ●                                               | ●                                        | ●                                    | ●          |
| DeFronzo 2015               | ?                                           | ●                                       | ?                                                         | ●                                               | ?                                        | ●                                    | ●          |
| Fonseca 2013                | ?                                           | ?                                       | ?                                                         | ●                                               | ●                                        | ●                                    | ●          |
| Forst 2014                  | ●                                           | ●                                       | ●                                                         | ●                                               | ●                                        | ●                                    | ●          |
| Haring 2013                 | ●                                           | ●                                       | ?                                                         | ●                                               | ●                                        | ●                                    | ●          |
| Haring 2014                 | ●                                           | ●                                       | ?                                                         | ●                                               | ●                                        | ●                                    | ●          |
| Inagaki 2014                | ●                                           | ●                                       | ●                                                         | ●                                               | ?                                        | ●                                    | ●          |
| Ji 2014                     | ●                                           | ●                                       | ●                                                         | ●                                               | ●                                        | ●                                    | ●          |
| Ji 2015                     | ●                                           | ?                                       | ●                                                         | ●                                               | ●                                        | ●                                    | ●          |
| Kadowaki 2014               | ●                                           | ●                                       | ?                                                         | ●                                               | ?                                        | ●                                    | ●          |
| Kaku 2014                   | ●                                           | ●                                       | ●                                                         | ●                                               | ●                                        | ●                                    | ●          |
| Kashiwagi 2015 DI BRIGTHEN  | ?                                           | ?                                       | ?                                                         | ●                                               | ●                                        | ●                                    | ●          |
| Kashiwagi 2015 DI EMIT      | ?                                           | ●                                       | ●                                                         | ●                                               | ●                                        | ●                                    | ●          |
| Kashiwagi 2015 DI SPOTLIGHT | ?                                           | ●                                       | ●                                                         | ●                                               | ●                                        | ●                                    | ●          |
| Kashiwagi 2015 DOM LANTERN  | ?                                           | ?                                       | ?                                                         | ●                                               | ●                                        | ●                                    | ●          |
| Kohan 2014                  | ?                                           | ?                                       | ?                                                         | ●                                               | ●                                        | ●                                    | ●          |
| Kovacs 2014                 | ●                                           | ●                                       | ?                                                         | ●                                               | ●                                        | ●                                    | ●          |
| Lambers Heerspink 2013      | ●                                           | ●                                       | ●                                                         | ●                                               | ?                                        | ●                                    | ●          |
| Lavalle-Gonzalez 2013       | ●                                           | ?                                       | ●                                                         | ●                                               | ●                                        | ●                                    | ●          |
| Lewin 2015                  | ?                                           | ●                                       | ?                                                         | ●                                               | ?                                        | ●                                    | ●          |
| Lu 2016                     | ●                                           | ●                                       | ●                                                         | ●                                               | ●                                        | ●                                    | ●          |
| Nauck 2011                  | ●                                           | ●                                       | ●                                                         | ●                                               | ●                                        | ●                                    | ●          |
| Nishimura 2015              | ?                                           | ?                                       | ?                                                         | ●                                               | ?                                        | ●                                    | ●          |
| Qiu 2014                    | ?                                           | ?                                       | ●                                                         | ●                                               | ●                                        | ●                                    | ●          |
| Ridderstrale 2014           | ●                                           | ●                                       | ●                                                         | ●                                               | ●                                        | ●                                    | ●          |
| Rodbard 2016                | ●                                           | ●                                       | ?                                                         | ●                                               | ●                                        | ●                                    | ●          |
| Roden 2013                  | ●                                           | ●                                       | ●                                                         | ●                                               | ●                                        | ●                                    | ●          |
| Rosenstock 2014             | ?                                           | ●                                       | ?                                                         | ●                                               | ●                                        | ●                                    | ●          |
| Rosenstock 2015             | ●                                           | ●                                       | ?                                                         | ●                                               | ●                                        | ●                                    | ●          |
| Rosenstock 2016             | ●                                           | ●                                       | ●                                                         | ●                                               | ●                                        | ●                                    | ●          |
| Ross 2015                   | ?                                           | ?                                       | ?                                                         | ●                                               | ?                                        | ●                                    | ●          |
| Schemthaler 2013            | ●                                           | ●                                       | ●                                                         | ●                                               | ●                                        | ●                                    | ●          |
| Schumm-Draeger 2015         | ●                                           | ●                                       | ●                                                         | ●                                               | ●                                        | ●                                    | ●          |
| Sha 2014                    | ?                                           | ?                                       | ?                                                         | ●                                               | ●                                        | ●                                    | ●          |
| Strojek 2011                | ●                                           | ?                                       | ●                                                         | ●                                               | ●                                        | ●                                    | ●          |
| Tikkanen 2015               | ●                                           | ●                                       | ?                                                         | ●                                               | ●                                        | ●                                    | ●          |
| Wanner 2016                 | ●                                           | ●                                       | ●                                                         | ●                                               | ●                                        | ●                                    | ●          |
| Weber 2016                  | ●                                           | ●                                       | ●                                                         | ●                                               | ●                                        | ●                                    | ●          |
| Wilding 2009                | ?                                           | ?                                       | ?                                                         | ●                                               | ●                                        | ●                                    | ●          |
| Wilding 2012                | ●                                           | ●                                       | ●                                                         | ●                                               | ●                                        | ●                                    | ●          |
| Wilding 2013 DOM            | ?                                           | ?                                       | ?                                                         | ●                                               | ●                                        | ●                                    | ●          |
| Wilding 2013 JCP            | ●                                           | ●                                       | ●                                                         | ●                                               | ●                                        | ●                                    | ●          |
| Yale 2013                   | ●                                           | ●                                       | ?                                                         | ●                                               | ●                                        | ●                                    | ●          |
