# Supplementary material for: Effects of sodium-glucose co-transporter 2 (SGLT2) inhibition on renal function and albuminuria in patients with type 2 diabetes: a systematic review and meta-analysis
Source: PubMed Central journal article supplement (PMC5490461; doi:10.7717/peerj.3405), 2017-06-27

Funnel plot with pseudo 95% confidence limits

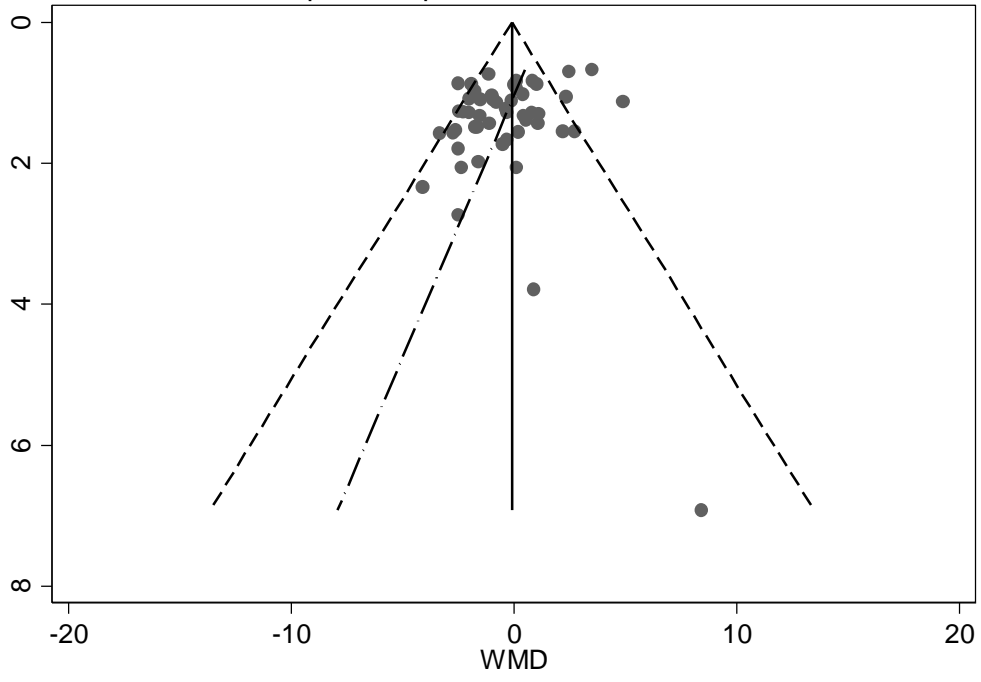

Supplement: peerj-05-3405-s003.pdf [file peerj-05-3405-s003.pdf]
